Title : ANALYSIS OF VENTILATORY DEPRESSION BY ENFLURANE

Author : W.M. Wahba, F.R.C.P.(C).

Affiliation: Department of Anaesthesia, Queen Elizabeth Hospital of Montreal, and McGill University, Montreal, Québec H4A 3L6.

**Introduction.** The present study was designed to more clearly define the mechanism of ventilatory depression during enflurane anesthesia by measuring tracheal pressure generated during airway occlusion ( $P^0$ ) at FRC (i.e. the mechanical transform of neuromuscular ventilatory drive<sup>1</sup>), the duration of inspiration, and minute ventilation.

**Methods.** Ten perfectly healthy, consenting adults ( $FEV_{1.0} > 85\%$  predicted) scheduled for peripheral operations were included in the study approved by the hospital Ethics Committee. Anesthetic technique: phenothiazine premedication, thiopentone induction, intubation, then enflurane in  $N_2O:O_2$  in a non-rebreathing system. After stabilization for twenty minutes at as many vaporizer settings as possible, we measured: VE, f,  $PaCO_2$ ,  $P^0$  and  $T_1$ ; and derived: mean inspiratory flow rate ( $VT/T_1$ ), impedance ( $P^0 \cdot 0.5"/VT/T_1$ ) and elastance ( $P^0 \max./VT$ ).

**Results.** In all subjects ventilation was significantly less at the higher inspired concentrations without change in frequency (Table I). The features of  $P^0$  tracings were: a progressive reduction in amplitude and slope, and a clear cut reduction in the time-tension index. Figure 1 is a representative tracing (with the expected value at 0.1 sec. in awake subjects rebreathing  $CO_2$  marked by "x"). Mean inspiratory flow rates were invariably less at deeper levels due to the combined effects of reduced VT and shortened  $T_1$ . Impedance to flow was unchanged due to the proportionate changes in  $P^0$  and  $VT/T_1$ . But, pulmonary elastance (stiffness) increased at deeper levels (Figure 2).

**Discussion.** Hypoventilation is due to a reduction in the mechanical transform of neuromuscular output coupled with a shorter inspiratory time (i.e. reduced flow rate). Reduced  $P^0$  is due to central depression and the dose-related, curare-like effect of enflurane on muscles, which is not reversed by neostigmine<sup>2</sup>. Differentiation, therefore, is impossible. But the progressive reduction in  $P^0$  slope and the unchanged frequency suggest that the changes in  $P^0$  are largely muscular. The shorter  $T_1$  may be a homeostatic reflex. This relative pump failure, together with lung stiffness, will compound the consequences of anesthesia on pulmonary mechanics<sup>3</sup> and central depression.

#### References.

1. Milic-Emili, J: Recent advances in the evaluation of respiratory drive. *Int. Anes. Clin* 15(2):39-58, 1977.
2. Lebowitz MH, Blitt CD, Walts LF. Depression of twitch response to stimulation

of the ulnar nerve during Ethrane anesthesia in man. *Anesthesiology* 33:52-57, 1970.

3. Westbrook PR, Stubbs SE, Sessler AD, et al: Effects of anesthesia and muscle paralysis on respiratory mechanics in normal man. *J. Appl. Physiol* 34:81-86, 1973.

TABLE I

|                                 | INSPIRED ENFLURANE CONCENTRATION (%) |             |             |             |
|---------------------------------|--------------------------------------|-------------|-------------|-------------|
|                                 | 1.0                                  | 1.5         | 2           | 3           |
| Min. Ventilatin<br>$l/m^2/min.$ | 3.3<br>.6 <sup>*</sup>               | 3.57<br>.56 | 3.17<br>.36 | 2.13<br>.24 |
| Frequency<br>bpm                | 20.5<br>2.0                          | 24.0<br>3.2 | 23.9<br>1.6 | 20.9<br>1.6 |
| $PaCO_2$<br>torr                | 38.0<br>2.0                          | 40.6<br>4.0 | 47.2<br>5.0 | 51.2<br>3.8 |
| Inspir. Time<br>$T_1$ sec.      | .98<br>.12                           | .88<br>.13  | .79<br>.10  | .61<br>.13  |
| $VT/T_1$<br>$l/sec.$            | .36<br>.05                           | .37<br>.04  | .36<br>.07  | .24<br>.04  |
| Impedance<br>$cm H_2O/l/sec$    | 17.0<br>4.0                          | 20.0<br>7.0 | 24.0<br>5.0 | 27.2<br>4.6 |

\* Significantly different from value at 1% or 1.5%.

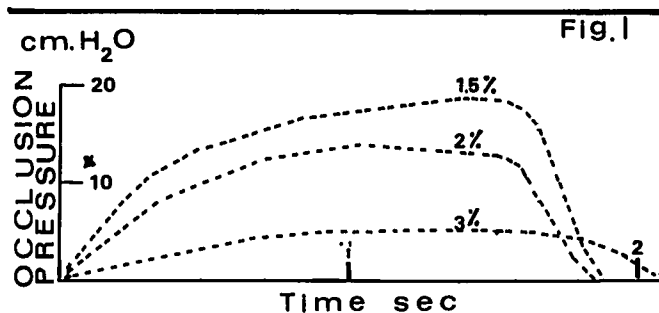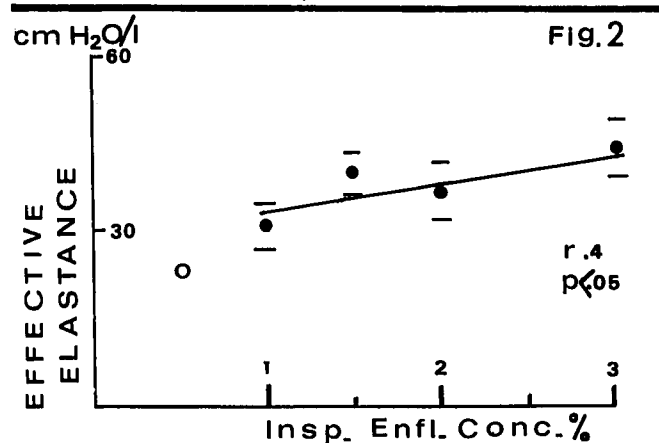

Source: https://asa2.silverchair.com/anesthesiology/article-pdf/51/3/S383/624367/0000542-197909001-00382.pdf
